# Supplementary material for: MCT1 Is a New Prognostic Biomarker and Its Therapeutic Inhibition Boosts Response to Temozolomide in Human Glioblastoma
Source: MDPI journal article supplement (doi:10.3390/cancers13143468), 2021-07-11
Supplement: s1 [file s1]

# MCT1 Is a New Prognostic Biomarker and Its Therapeutic Inhibition Boosts Response to Temozolomide in Human Glioblastoma

Vera Miranda-Gonçalves, Céline S. Gonçalves, Sara Granja, Joana Vieira de Castro, Rui M. Reis, Bruno M. Costa and Fátima Baltazar

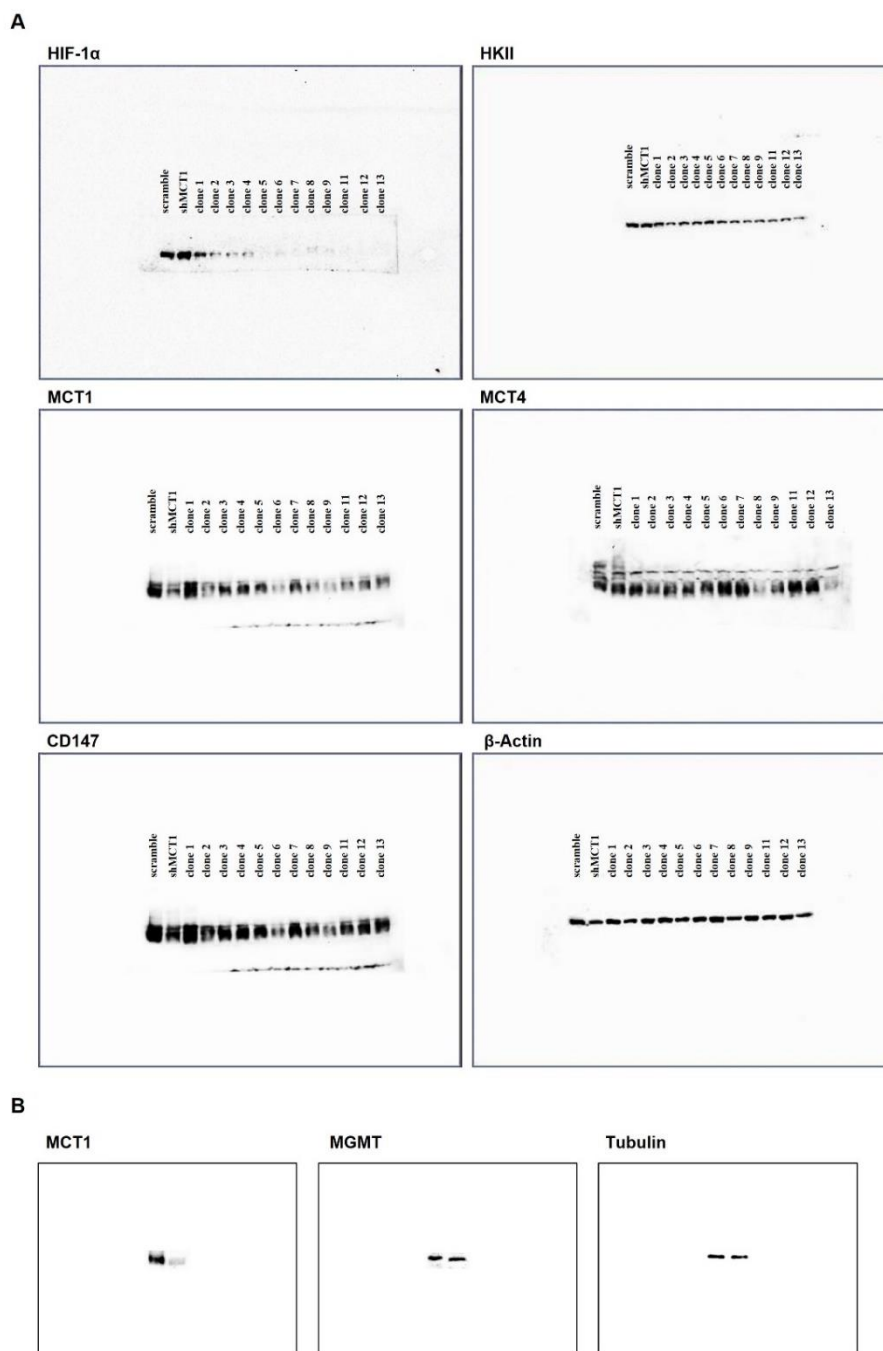

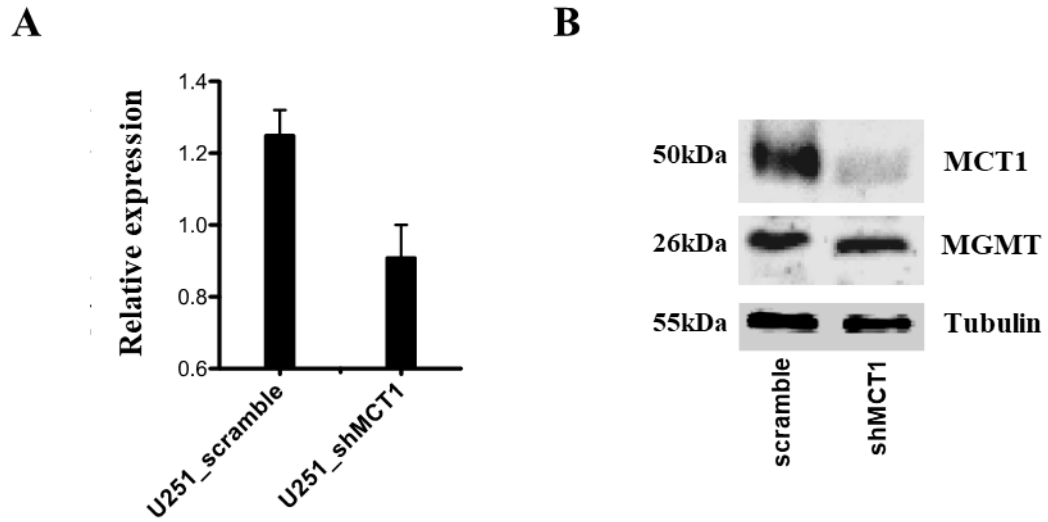

**Figure S2.** MGMT expression in U251 shMCT1 cells. Relative MGMT expression in U251 shMCT1 cells at transcriptional level by real time PCR (**A**) and at protein level by WB (**B**). Results are representative of three independent experiments. WB molecular weights: MCT1, 50kDa and MGMT, 26kDa.
